# Supplementary material
Source: PubMed Central journal article supplement (PMC1299251)
Supplement: 6-7400341s1.pdf [file 6-7400341s1.pdf]

**Supplemental Information:**

*Title:* Selective charging of tRNA isoacceptors induced by amino acid starvation.

*Author:* Kimberly A. Dittmar, Michael A. Sørensen, Johan Elf, Måns Ehrenberg, Tao Pan.

*1. E. coli tRNA probes and theoretically predicted charged levels.*

| <b>Amino Acid</b> | <b>tRNA Probe</b> | <b>Anticodon</b> | <b>Predicted charged level upon starvation<sup>a</sup></b> | <b>Operons</b>   |
|-------------------|-------------------|------------------|------------------------------------------------------------|------------------|
| Ala               | Ala-1             | UGC              | Intermediate                                               | V, U, T          |
|                   | Ala-2             | GGC              | Low                                                        | X, W             |
| Arg               | Arg-2             | ACG              | Low                                                        | Q, Z, Y, V       |
|                   | Arg-3             | CCG              | High                                                       | X                |
|                   | Arg-4             | UCU              | High                                                       | U                |
|                   | Arg-5             | CCU              | High                                                       | W                |
| Asn               | Asn               | GUU              | -                                                          | T, W, U, V       |
| Asp               | Asp               | GUC              | -                                                          | U, V, T          |
| Cys               | Cys               | GCA              | -                                                          | T                |
| Gln               | Gln-1             | UUG              | Low                                                        | W, U             |
|                   | Gln-2             | CUG              | Low                                                        | X, V             |
| Glu               | Glu               | UUC              | -                                                          | W, U, T, V       |
| Gly               | Gly-1             | CCC              | High                                                       | T                |
|                   | Gly-2             | UCC              | High                                                       | U                |
|                   | Gly-3             | GCC              | Low                                                        | W, V, X, Y       |
| His               | His               | GUG              | -                                                          | R                |
| Ile               | Ile-1             | GAU              | Low                                                        | V, U, T          |
|                   | Ile-2             | CAU              | High                                                       | Y, X             |
| Leu               | Leu-1             | CAG              | Low                                                        | T, V, P, Q       |
|                   | Leu-2             | GAG              | Low                                                        | U                |
|                   | Leu-3             | UAG              | Low                                                        | W                |
|                   | Leu-4             | CAA              | High                                                       | X                |
|                   | Leu-5             | UAA              | Intermediate                                               | Z                |
| Lys               | Lys               | UUU              | -                                                          | T, W, Y, Z, Q, V |
| Met               | Met               | CAU              | -                                                          | U, T             |
|                   | fMet              | CAU              | -                                                          | Z, W, V, Y       |
| Phe               | Phe               | GAA              | -                                                          | V, U             |
| Pro               | Pro-1             | CGG              | Low                                                        | K                |
|                   | Pro-2             | GGG              | High                                                       | L                |
|                   | Pro-3             | UGG              | Low                                                        | M                |
| Sec               | Sec               | UCA              | -                                                          | C                |
| Ser               | Ser-1             | UGA              | Low                                                        | T                |
|                   | Ser-2             | CGA              | Intermediate                                               | U                |
|                   | Ser-3             | GCU              | Intermediate                                               | V                |
|                   | Ser-5             | GGA              | Low                                                        | W, X             |
| Thr               | Thr-1/3           | GGU              | Low                                                        | V, T             |
|                   | Thr-2             | CGU              | High                                                       | W                |
|                   | Thr-4             | UGU              | Intermediate                                               | U                |
| Trp               | Trp               | CCA              | -                                                          | T                |
|                   | Tyr               | GUA              | -                                                          | V, T, U          |
| Val               | Val-1             | UAC              | Low                                                        | T, Z, U, X, Y    |
|                   | Val-2A            | GAC              | Low                                                        | V                |
|                   | Val-2B            | GAC              | Low                                                        | W                |

a. Charged level: high: 0.50 – 1.00; intermediate: 0.10 – 0.50; low: < 0.10.

2. Determination of charged levels of a single sample by microarray (Fig. 2):

The Cy3 and Cy5 succinimidyl ester derivatives often exhibit differential reactivity for different RNA molecules. In addition, many *E. coli* tRNAs have post-transcriptional modifications (Bjork, 1995; Rozenski et al., 1999) that contain either an aliphatic primary amine (lysidine at position 34, <sup>acp3</sup>U at position 47) or a secondary amine (Q, <sup>mnm5</sup>U, <sup>mnm5s2</sup>U and <sup>cmnm5</sup>U, all at position 34). The Cy3 and Cy5 succinimidyl ester reacts preferentially with 5-aminoallyl group in the tagging oligonucleotide to the 3' end of tRNA (data not shown). However, the amine groups derived from internal tRNA modifications can also react with the dye and affect the calculation of charged levels.

To accurately measure the charged levels for a particular sample (Fig. 2), four array experiments were performed:

| Array # | X in the tagging oligonucleotide | Periodate-treated sample label | mock-treated sample label |
|---------|----------------------------------|--------------------------------|---------------------------|
| 1       | 5NU                              | Cy5                            | Cy3                       |
| 2       | 5NU                              | Cy3                            | Cy5                       |
| 3       | dT                               | Cy5                            | Cy3                       |
| 4       | dT                               | Cy3                            | Cy5                       |

The third and fourth arrays measure the contribution of internal tRNA modifications to the observed fluorescent values in the first and second arrays. tRNAs containing internal modifications made of primary or secondary amines are more reactive than those without in the third and fourth arrays (data not shown). The data for Arg-5, Ser-2 and Sec-1 are less certain due to the very low fluorescent intensities of the corresponding tRNAs.

A correction factor is used in the calculation of charged levels for each tRNA to correct for the fluorescent signals derived from internal modifications:

$$\text{Charged level I} = (\text{Cy5/Cy3})^{\text{Array1}} * (1 - \text{Cy5}^{\text{Array3}}/\text{Cy5}^{\text{Array1}}) / (1 - \text{Cy3}^{\text{Array3}}/\text{Cy3}^{\text{Array1}}) \quad [1]$$

$$\text{Charged level II} = (\text{Cy3/Cy5})^{\text{Array2}} * (1 - \text{Cy3}^{\text{Array4}}/\text{Cy3}^{\text{Array2}}) / (1 - \text{Cy5}^{\text{Array4}}/\text{Cy5}^{\text{Array2}}) \quad [2]$$

Both  $(\text{Cy5/Cy3})^{\text{Array1}}$  and  $(\text{Cy3/Cy5})^{\text{Array2}}$  for each tRNA have been normalized to the added yeast tRNA<sup>Phe</sup> control with a known charged level measured by thin-layer chromatography (0.64 - 0.68, (Wolfson and Uhlenbeck, 2002)). In the absence of dye bias, both measurements should produce the same charged levels for each tRNA regardless of which sample is labeled with which dye (Fig. 2).

3. *Determination of relative charged levels for the starvation series (Fig. 4 and Table 1):*

In order to determine the relative charged levels, the Cy5/Cy3 ratios for samples before and after starvation need to be corrected for signals derived from internal amine modifications. Since these internal tRNA modifications are not expected to change during the period of starvation, we used the following formula to calculate the relative charged levels:

$$[3a] \quad F5(t) = Cy5(t) - [Cy3(t)/Cy3(0)] * Cy5^{Array3}$$

$$[3b] \quad F3(t) = Cy3(t) - [Cy3(t)/Cy3(0)] * Cy3^{Array3}$$

$$\text{Relative charged level} = \{F5(t)/F3(t)\} / \{F5(0)/F3(0)\} \quad [3]$$

Where Cy5(t) and Cy3(t) are the Cy5 and Cy3 fluorescence signals of the samples from varying time points after starvation and Cy5(0) and Cy3(0) are the fluorescence signals of the sample before starvation. The factor Cy3(t)/Cy3(0) is used to correct for the relative amount of total tRNA in each array experiment.

4. Remarks on microarray measurements:

(i) Cross-hybridization: Our array contains probes for tRNA from three organisms, *E. coli*, *Bacillus subtilis* and *Sacchromyces cerevisiae*. As in previous work (Dittmar et al., 2004), the inclusion of tRNA from different organisms is useful as a specificity control. There is little detectable cross-hybridization between *S. cerevisiae* and *E. coli* tRNA. *E. coli* samples cross-hybridize to several probes designated for *B. subtilis* tRNA. Sequence similarities between tRNAs from *E. coli* and *B. subtilis* can explain some cross-hybridizations (Ala-1, Ala-2, Asp, Gly-3, Ile-1, Val-1), but not others (Leu-1, fMet).

(ii) Hybridization to Arginine probes: The absolute fluorescence intensity before starvation of the four tRNA<sup>Arg</sup> isoacceptors has the same rank order to those determined by two-dimensional gel electrophoresis (Dong et al., 1996), suggesting that there is no significant cross-hybridization to these probes from other *E. coli* tRNAs. Furthermore, we looked at all *E. coli* tRNA sequences and cannot find an obvious candidate for cross-hybridization to the tRNA<sup>Arg2</sup> probe.

| tRNA <sup>Arg</sup> | Relative Cy3-value from t=0 sample (Fig. 2A) | 2-D gel, at doubling times of 0.7-1.1/h |
|---------------------|----------------------------------------------|-----------------------------------------|
| 2                   | 1.0                                          | 1.0                                     |
| 3                   | 0.16                                         | 0.13 ± 0.04                             |
| 4                   | 0.55                                         | 0.16 ± 0.02                             |
| 5                   | 0.07                                         | 0.10 ± 0.01                             |

The actual differences may be derived from variations in (a) labeling and hybridization efficiencies of these isoacceptors, (b) *E. coli* strains used in these experiments, (c) growth conditions leading to differences in tRNA concentrations.

(iii) Dilution series: tRNA<sup>Arg2</sup> is present at the highest level among all tRNA<sup>Arg</sup> isoacceptors. The observed high charged level of this tRNA after arginine starvation may be due to saturation of the Arg-2 probe under standard condition for the array experiment which uses 0.9 µg each of Cy5 and Cy3 labeled total RNA. To ensure that this probe was not saturated under the above condition, another array experiment was performed using 0.3 µg each of Cy5 and Cy3 labeled total RNA after 45 minutes of arginine starvation. Comparing the same total RNA sample at 0.9 and 0.3 µg used in hybridization, the relative charged ratios for tRNA<sup>Arg2, 3, 4</sup> isoacceptors remain constant (1.09; 1.10; 0.95, respectively. A high variation for tRNA<sup>Arg5</sup> was observed, likely due to its very low signal intensity, Fig. 2A). This result demonstrates that the observed high charged level for tRNA<sup>Arg2</sup> does not result from probe saturation.

(iv) Arginine starvation series: The microarray experiment differentiates tRNAs having protected 3' ends against periodate oxidation from those that are not protected. Such protecting groups include covalently attached amino acids, peptides released from ribosomes, as well as unidentified cryptic compounds (Yegian and Stent, 1969a; Yegian and Stent, 1969b). However, these cryptic charged forms of tRNA<sup>Arg2</sup> during arginine starvation were not detected by the Northern blot analysis (Sorensen, 2001).

The primary protecting group against periodate oxidation is the amino acid under non-starving conditions (Jakubowski and Goldman, 1984; Morris and DeMoss, 1966). Under starvation conditions, however, the other two protecting groups may make more significant contributions to the Cy5/Cy3 ratio, depending on the tRNA isoacceptor. It is possible that non-amino acids contribute significantly against periodate oxidation of tRNA<sup>Arg2</sup> during arginine starvation. The microarray results on tRNA<sup>Arg2</sup> after arginine starvation are similar to a previous

result in which the charged level was measured by periodate oxidation followed by tRNA-synthetase charging with radioactive arginine (Morris and DeMoss, 1965).



## References

- Bjork, G.R. (1995) Biosynthesis and function of modified nucleosides. In Soll, D. and RajBhandary, U. (eds.), *tRNA: structure, biosynthesis, and function*. ASM press, Washington, D.C., pp. 165-206.
- Dittmar, K.A., Mobley, E.M., Radek, A.J. and Pan, T. (2004) Exploring the regulation of tRNA distribution on the genomic scale. *J. Mol. Biol.*, **337**, 31-47.
- Dong, H., Nilsson, L. and Kurland, C.G. (1996) Co-variation of tRNA abundance and codon usage in *Escherichia coli* at different growth rates. *J. Mol. Biol.*, **260**, 649-663.
- Jakubowski, H. and Goldman, E. (1984) Quantities of individual aminoacyl-tRNA families and their turnover in *Escherichia coli*. *J. Bacteriol.*, **158**, 769-776.
- Morris, D.W. and DeMoss, J.A. (1965) Role of aminoacyl-transfer ribonucleic acid in the regulation of ribonucleic acid synthesis in *Escherichia coli*. *J. Bacteriol.*, **90**, 1624-1631.
- Morris, D.W. and DeMoss, J.A. (1966) Polysome transitions and the regulation of ribonucleic acid synthesis in *Escherichia coli*. *Proc. Natl. Acad. Sci. USA*, **56**, 262-268.
- Rozenski, J., Crain, P.F. and McCloskey, J.A. (1999) The RNA Modification Database: 1999 update. *Nucleic Acids Res.*, **27**, 196-197.
- Sorensen, M.A. (2001) Charging levels of four tRNA species in *Escherichia coli* Rel(+) and Rel(-) strains during amino acid starvation: a simple model for the effect of ppGpp on translational accuracy. *J. Mol. Biol.*, **307**, 785-798.
- Wolfson, A.D. and Uhlenbeck, O.C. (2002) Modulation of tRNA<sup>Ala</sup> identity by inorganic pyrophosphatase. *Proc. Natl. Acad. Sci. USA*, **99**, 5965-5970.
- Yegian, C.D. and Stent, G.S. (1969a) Differential aminoacylation of three species of isoleucine transfer RNA from *Escherichia coli*. *J. Mol. Biol.*, **39**, 59-71.
- Yegian, C.D. and Stent, G.S. (1969b) An unusual condition of leucine transfer RNA appearing during leucine starvation of *Escherichia coli*. *J. Mol. Biol.*, **39**, 45-58.
